# Supplementary material
Source: publisher figshare collection journal article supplement (https://karger.figshare.com/articles/dataset/_/5104501)
Supplement: Supplementary file 1 [file 1]

## Survival Curves

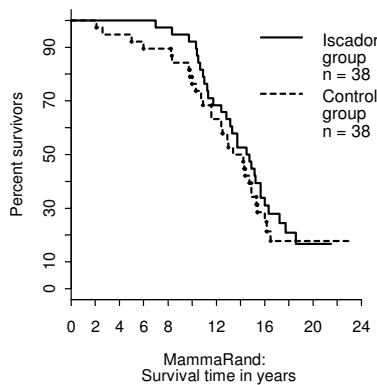

**Figure 2:** 'MammaRand' (38 randomized matched-pairs): Kaplan-Meier survival curves for the full set showing the two groups with and without Iscador.

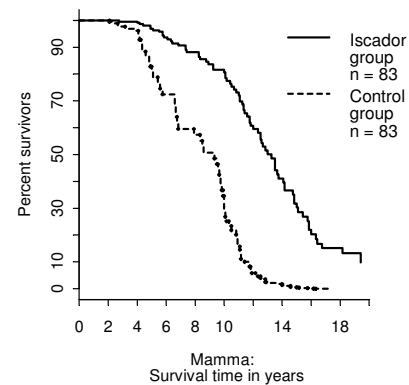

**Figure 3:** 'Mamma' (84 non-randomized matched-pairs, 1 pair with missing values): Adjusted survival curves, showing the two groups with and without Iscador, based on the model\* in Table 6.

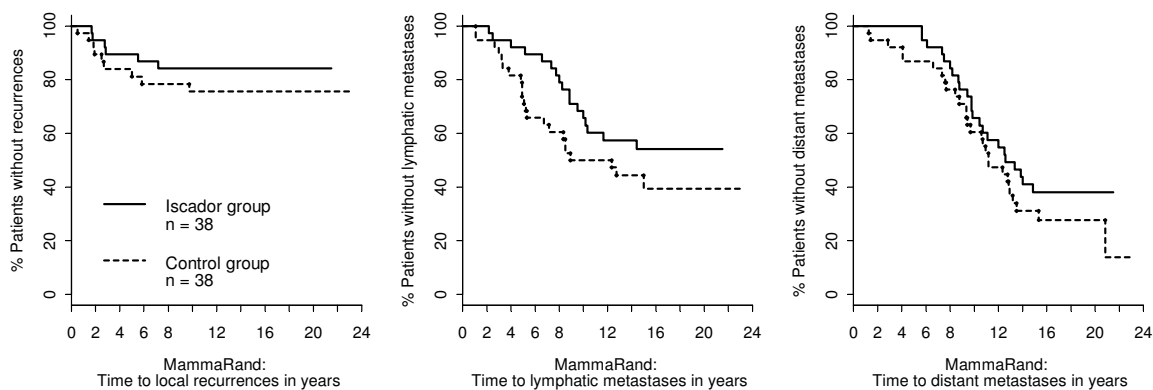

**Figure 4:** 'MammaRand' (38 randomized matched-pairs): Kaplan-Meier curves for time to local recurrences, to lymphatic metastases and to distant metastases respectively, showing the two groups with and without Iscador.

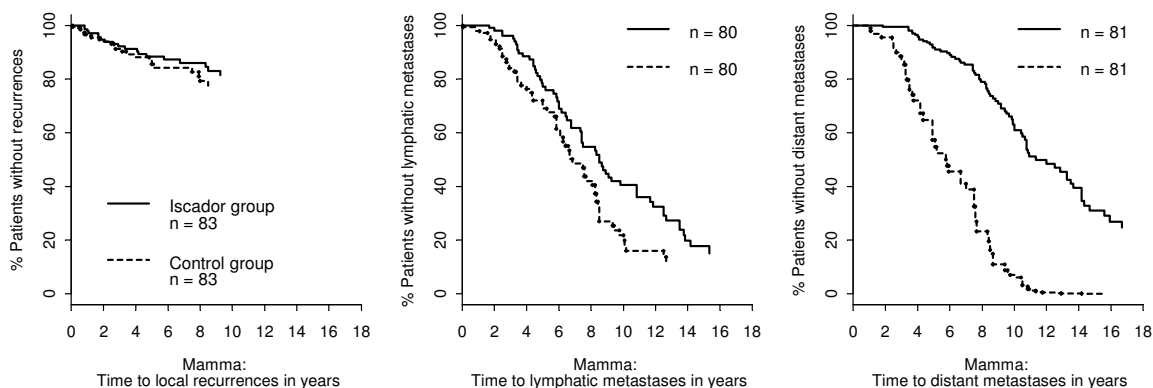

**Figure 5:** 'Mamma' (84 non-randomized matched-pairs): Adjusted time to event curves for time to local recurrences (1 pair with missing values), to lymphatic metastases (4 pairs with missing values) and to distant metastases (3 pairs with missing values) respectively, showing the two groups with and without Iscador, based on the models from Table 8 (type of analysis: III; model with interactions only in the case of time to event of distant metastases).
