# Supplementary material
Source: publisher figshare collection journal article supplement (https://karger.figshare.com/articles/dataset/_/5104501)
Supplement: Supplementary file 4 [file 1]

Archive with 3 entries (3 files):
- Supplemental1.pdf
- Supplemental2.pdf
- Supplemental3.pdf
